# Supplementary material for: Temporal change in characteristics and outcomes of acute kidney injury on renal replacement therapy in intensive care units: analysis of a nationwide administrative database in Japan, 2007–2016
Source: Springer Nature journal article supplement (doi:10.1186/s13054-019-2468-8), 2019-05-15
Supplement: MOESM1 [file 16726522]

## Online Supplementary Material

### Temporal change in characteristics and outcomes of acute kidney injury on renal replacement therapy in intensive care units: Analysis of a nationwide administrative database in Japan, 2007–2016

Yoshihisa Miyamoto, Masao Iwagami, Shotaro Aso, Hideo Yasunaga, Hiroki Matsui, Kiyohide Fushimi, Yoshifumi Hamasaki, Masaomi Nangaku, Kent Doi

#### Contents:

File 1. Characteristics of patients treated with continuous renal replacement therapy for acute kidney injury in intensive care units from 2007 to 2016

File 2. Characteristics of patients treated with intermittent renal replacement therapy for acute kidney injury in intensive care units from 2007 to 2016

File 3. Trends in the proportion of co-interventions by subgroups in patients treated with renal replacement therapy for acute kidney injury in intensive care units from 2007 to 2016

File 4. Subgroup analyses: in-hospital mortality of patients treated with renal replacement therapy for acute kidney injury in intensive care units from 2007 to 2016

File 5. The proportion of RRT dependence at discharge stratified by CKD, in patients treated with renal replacement therapy for acute kidney injury in intensive care units from 2007 to 2016

**File 1. Characteristics of patients treated with continuous renal replacement therapy for acute kidney injury in intensive care units from 2007 to 2016**

| Year                                                                     | 2007      | 2008      | 2009      | 2010      | 2011      | 2012      | 2013      | 2014      | 2015      | 2016      | P for trend |
|--------------------------------------------------------------------------|-----------|-----------|-----------|-----------|-----------|-----------|-----------|-----------|-----------|-----------|-------------|
| Number of patients on CRRT                                               | 3027      | 3330      | 2882      | 3922      | 4050      | 4348      | 4352      | 4458      | 4655      | 4447      |             |
| Age (years, mean)                                                        | 67.6      | 68.0      | 68.5      | 68.0      | 68.3      | 68.7      | 68.5      | 69.0      | 68.9      | 68.9      | <0.001      |
| Sex (male, %)                                                            | 64.2      | 65.9      | 65.5      | 66.0      | 65.2      | 66.1      | 65.1      | 66.8      | 65.6      | 64.1      | 0.955       |
| Main diagnosis category (%)                                              |           |           |           |           |           |           |           |           |           |           |             |
| i) sepsis                                                                | 27.3      | 29.3      | 30.4      | 32.6      | 32.0      | 32.3      | 33.1      | 32.8      | 33.4      | 34.7      | <0.001      |
| ii) cardiovascular surgery                                               | 14.6      | 14.5      | 16.1      | 16.1      | 16.1      | 17.2      | 16.4      | 16.9      | 17.6      | 16.1      | <0.001      |
| iii) coronary artery disease                                             | 10.1      | 9.5       | 9.3       | 7.7       | 8.5       | 7.8       | 8.0       | 7.8       | 8.2       | 8.4       | <0.001      |
| iv) non-coronary heart disease                                           | 25.0      | 25.2      | 24.2      | 23.2      | 23.8      | 23.7      | 23.2      | 23.3      | 22.7      | 22.6      | <0.001      |
| v) central nervous system disorders                                      | 5.1       | 4.9       | 4.2       | 4.8       | 4.7       | 4.7       | 4.2       | 4.2       | 4.6       | 4.5       | 0.150       |
| vi) trauma                                                               | 1.9       | 2.1       | 2.0       | 2.4       | 2.5       | 2.5       | 2.5       | 2.6       | 1.9       | 2.7       | 0.120       |
| vii) other                                                               | 16.0      | 14.5      | 13.7      | 13.2      | 12.4      | 11.9      | 12.7      | 12.4      | 11.7      | 11.1      | <0.001      |
| Route of ICU admission (%)                                               |           |           |           |           |           |           |           |           |           |           |             |
| Emergency room                                                           | 58.1      | 59.5      | 60.0      | 58.7      | 59.5      | 60.7      | 62.6      | 64.7      | 65.0      | 64.9      | <0.001      |
| Operation room                                                           | 16.3      | 17.3      | 18.2      | 19.8      | 20.5      | 20.5      | 19.5      | 18.8      | 19.7      | 20.2      | <0.001      |
| Ward                                                                     | 25.5      | 23.2      | 21.8      | 21.5      | 20.0      | 18.7      | 17.9      | 16.4      | 15.3      | 14.9      | <0.001      |
| Charlson comorbidity index (%)                                           |           |           |           |           |           |           |           |           |           |           |             |
| Score 0                                                                  | 35.1      | 32.9      | 31.7      | 31.4      | 31.8      | 32.4      | 32.3      | 31.8      | 32.3      | 30.2      | 0.003       |
| Score 1                                                                  | 14.6      | 14.2      | 14.9      | 13.0      | 13.3      | 12.6      | 12.4      | 12.9      | 11.9      | 11.5      | <0.001      |
| Score 2                                                                  | 26.0      | 27.7      | 27.1      | 27.8      | 28.9      | 27.5      | 27.2      | 29.0      | 28.6      | 28.3      | 0.020       |
| Score 3                                                                  | 13.0      | 13.1      | 12.9      | 13.8      | 13.4      | 14.2      | 14.4      | 12.8      | 14.2      | 14.1      | 0.056       |
| Score ≥4                                                                 | 11.4      | 12.1      | 13.5      | 14.0      | 12.7      | 13.4      | 13.7      | 13.5      | 13.0      | 15.9      | <0.001      |
| Chronic kidney disease (%)                                               | 20.5      | 21.7      | 21.1      | 20.4      | 20.0      | 20.1      | 19.3      | 19.0      | 18.5      | 19.3      | <0.001      |
| Duration from hospital admission to CRRT initiation (days, median [IQR]) | 4 [2, 14] | 3 [2, 13] | 4 [2, 14] | 4 [2, 15] | 4 [2, 15] | 4 [2, 15] | 4 [2, 14] | 4 [2, 13] | 3 [2, 12] | 3 [2, 11] | <0.001      |

(Continued)

File 1. (CONTINUED)

| Treatment on day of CRRT initiation (%) |      |      |      |      |      |      |      |      |      |      |        |
|-----------------------------------------|------|------|------|------|------|------|------|------|------|------|--------|
| Mechanical ventilation                  | 57.7 | 58.5 | 59.5 | 62.3 | 61.6 | 63.0 | 62.1 | 62.5 | 62.6 | 63.4 | <0.001 |
| Any blood transfusion                   | 53.0 | 52.2 | 51.9 | 59.3 | 59.3 | 59.2 | 59.1 | 58.6 | 56.6 | 58.2 | <0.001 |
| (Red blood cell concentrates)           | 43.5 | 43.9 | 43.0 | 50.0 | 50.7 | 50.6 | 50.3 | 49.5 | 48.4 | 50.0 | <0.001 |
| (Fresh frozen plasma)                   | 30.7 | 29.7 | 30.1 | 34.4 | 34.5 | 35.5 | 36.0 | 35.6 | 33.4 | 33.7 | <0.001 |
| (Platelets)                             | 19.4 | 19.9 | 18.4 | 22.8 | 23.3 | 24.5 | 22.9 | 23.4 | 22.2 | 21.4 | <0.001 |
| Any vasoactive drug                     | 73.4 | 71.4 | 72.7 | 73.3 | 74.6 | 73.9 | 73.1 | 73.7 | 72.8 | 74.0 | 0.211  |
| (Dopamine)                              | 62.8 | 58.4 | 59.0 | 59.3 | 56.4 | 51.2 | 45.2 | 40.1 | 35.0 | 31.2 | <0.001 |
| (Dobutamine)                            | 28.5 | 28.1 | 27.6 | 25.1 | 25.1 | 27.1 | 26.4 | 26.1 | 26.8 | 26.6 | 0.081  |
| (Norepinephrine)                        | 38.5 | 39.4 | 39.6 | 43.4 | 47.6 | 49.6 | 52.9 | 56.5 | 57.5 | 59.6 | <0.001 |
| (Epinephrine)                           | 15.0 | 13.8 | 13.6 | 13.2 | 13.6 | 12.8 | 13.9 | 13.8 | 14.2 | 14.0 | 0.993  |
| Intra-aortic balloon pumping            | 8.0  | 8.8  | 8.8  | 8.0  | 8.0  | 8.8  | 9.0  | 9.3  | 9.1  | 8.3  | 0.184  |
| Extracorporeal membrane oxygenation     | 2.7  | 2.8  | 2.9  | 3.1  | 3.5  | 3.6  | 4.1  | 4.2  | 3.9  | 4.4  | <0.001 |
| Plasma exchange                         | 2.8  | 2.3  | 2.4  | 3.5  | 2.9  | 2.5  | 2.8  | 2.6  | 2.5  | 1.9  | 0.030  |

CRRT = continuous renal replacement therapy, ICU = intensive care unit, IQR = interquartile range.

**File 2.** Characteristics of patients treated with intermittent renal replacement therapy for acute kidney injury in intensive care units from 2007 to 2016

| Year                                                                    | 2007     | 2008     | 2009     | 2010     | 2011     | 2012     | 2013     | 2014     | 2015     | 2016     | P for trend |
|-------------------------------------------------------------------------|----------|----------|----------|----------|----------|----------|----------|----------|----------|----------|-------------|
| Number of patients on IRRT                                              | 865      | 809      | 644      | 995      | 1205     | 1440     | 1489     | 1607     | 1710     | 1523     |             |
| Age (years, mean)                                                       | 67.2     | 66.7     | 67.2     | 68.0     | 67.4     | 67.7     | 67.9     | 68.1     | 69.3     | 68.3     | <0.001      |
| Sex (male, %)                                                           | 68.9     | 69.1     | 67.2     | 65.4     | 67.6     | 65.6     | 65.2     | 67.4     | 65.8     | 66.3     | 0.098       |
| Main diagnosis category (%)                                             |          |          |          |          |          |          |          |          |          |          |             |
| i) sepsis                                                               | 9.0      | 9.1      | 8.4      | 7.6      | 8.4      | 6.2      | 7.5      | 7.0      | 7.1      | 6.4      | 0.002       |
| ii) cardiovascular surgery                                              | 9.0      | 8.8      | 10.1     | 10.2     | 10.7     | 9.5      | 10.5     | 11.9     | 11.2     | 11.0     | 0.010       |
| iii) coronary artery disease                                            | 13.3     | 12.5     | 12.3     | 8.0      | 6.0      | 5.1      | 3.8      | 4.9      | 3.9      | 2.7      | <0.001      |
| iv) non-coronary heart disease                                          | 33.8     | 36.7     | 33.5     | 37.6     | 36.0     | 40.1     | 37.8     | 36.5     | 39.7     | 40.4     | <0.001      |
| v) central nervous system disorders                                     | 9.5      | 12.9     | 14.8     | 11.5     | 11.5     | 10.4     | 12.0     | 10.7     | 10.9     | 12.3     | 0.871       |
| vi) trauma                                                              | 2.7      | 2.5      | 1.7      | 4.0      | 4.7      | 5.8      | 4.6      | 5.6      | 4.7      | 5.3      | <0.001      |
| vii) other                                                              | 22.8     | 17.6     | 19.3     | 21.1     | 22.7     | 22.9     | 23.8     | 23.3     | 22.5     | 21.9     | 0.043       |
| Route of ICU admission (%)                                              |          |          |          |          |          |          |          |          |          |          |             |
| Emergency room                                                          | 72.7     | 69.7     | 68.0     | 59.9     | 58.3     | 56.0     | 57.4     | 59.4     | 55.6     | 56.1     | <0.001      |
| Operation room                                                          | 17.2     | 20.4     | 22.0     | 32.1     | 34.9     | 36.5     | 36.2     | 33.4     | 38.0     | 38.3     | <0.001      |
| Ward                                                                    | 10.1     | 9.9      | 9.9      | 8.0      | 6.9      | 7.5      | 6.4      | 7.2      | 6.4      | 5.6      | <0.001      |
| Charlson comorbidity index (%)                                          |          |          |          |          |          |          |          |          |          |          |             |
| Score 0                                                                 | 26.1     | 22.0     | 21.3     | 18.6     | 19.4     | 18.5     | 20.8     | 19.1     | 20.1     | 19.2     | 0.002       |
| Score 1                                                                 | 23.4     | 27.8     | 25.8     | 26.6     | 27.7     | 27.7     | 27.3     | 26.6     | 24.5     | 24.2     | 0.355       |
| Score 2                                                                 | 23.1     | 20.6     | 19.9     | 19.7     | 18.8     | 18.8     | 19.1     | 20.1     | 19.8     | 18.1     | 0.032       |
| Score 3                                                                 | 18.0     | 17.6     | 21.3     | 20.8     | 19.8     | 20.5     | 19.9     | 20.2     | 20.2     | 20.9     | 0.105       |
| Score ≥4                                                                | 9.4      | 12.0     | 11.8     | 14.3     | 14.3     | 14.5     | 12.9     | 13.9     | 15.4     | 17.6     | <0.001      |
| Chronic kidney disease (%)                                              | 38.8     | 45.2     | 42.7     | 45.0     | 48.1     | 47.4     | 48.3     | 37.9     | 47.8     | 48.1     | <0.001      |
| Duration from hospital admission to RRT initiation (days, median [IQR]) | 2 [1, 9] | 2 [1, 7] | 2 [1, 9] | 2 [1, 6] | 2 [2, 4] | 2 [1, 4] | 2 [1, 4] | 2 [1, 4] | 2 [1, 4] | 2 [1, 4] | <0.001      |

(Continued)

File 2. (CONTINUED)

Treatment on day of IRRT initiation (%)

|                                     |      |      |      |      |      |      |      |      |      |      |        |
|-------------------------------------|------|------|------|------|------|------|------|------|------|------|--------|
| Mechanical ventilation              | 22.3 | 19.0 | 19.3 | 15.3 | 15.8 | 15.0 | 14.6 | 13.8 | 15.1 | 14.4 | <0.001 |
| Any blood transfusion               | 19.0 | 20.1 | 18.2 | 17.9 | 20.6 | 18.3 | 16.7 | 17.7 | 18.1 | 16.3 | 0.021  |
| (Red blood cell concentrates)       | 16.5 | 16.1 | 15.2 | 15.5 | 18.0 | 15.5 | 13.2 | 15.2 | 15.1 | 14.0 | 0.033  |
| (Fresh frozen plasma)               | 7.5  | 7.3  | 6.8  | 5.0  | 6.1  | 4.9  | 5.9  | 4.6  | 5.0  | 4.7  | <0.001 |
| (Platelets)                         | 4.3  | 4.9  | 3.6  | 3.2  | 3.4  | 3.0  | 4.1  | 3.7  | 3.1  | 2.6  | 0.013  |
| Any vasoactive drug                 | 24.7 | 23.0 | 18.2 | 16.5 | 16.3 | 14.0 | 12.2 | 13.1 | 12.9 | 11.8 | <0.001 |
| (Dopamine)                          | 19.8 | 19.0 | 15.2 | 11.1 | 10.5 | 8.3  | 5.9  | 5.0  | 4.8  | 4.5  | <0.001 |
| (Dobutamine)                        | 8.3  | 7.3  | 5.0  | 5.8  | 5.0  | 3.6  | 3.5  | 3.6  | 3.5  | 3.2  | <0.001 |
| (Norepinephrine)                    | 8.0  | 4.3  | 5.3  | 5.5  | 7.6  | 6.2  | 6.2  | 7.2  | 7.1  | 6.4  | 0.271  |
| (Epinephrine)                       | 2.2  | 2.3  | 1.2  | 1.1  | 1.1  | 0.8  | 0.6  | 0.7  | 0.8  | 0.8  | <0.001 |
| Intra-aortic balloon pumping        | 2.5  | 1.7  | 0.8  | 1.0  | 1.3  | 0.5  | 0.5  | 0.7  | 0.6  | 0.3  | <0.001 |
| Extracorporeal membrane oxygenation | 0.1  | 0.0  | 0.0  | 0.1  | 0.1  | 0.2  | 0.2  | 0.1  | 0.2  | 0.0  | NA     |
| Plasma exchange                     | 1.8  | 2.7  | 3.3  | 1.8  | 1.7  | 1.3  | 1.8  | 1.5  | 2.1  | 2.0  | 0.303  |

ICU = intensive care unit, IQR = interquartile range, IRRT = intermittent renal replacement therapy.

**File 3:** Trends in the proportion of co-interventions by subgroups in patients treated with renal replacement therapy for acute kidney injury in intensive care units from 2007 to 2016

CNS = central nervous system, ECMO = extracorporeal membrane oxygenation, IABP= intra-aortic balloon pumping, NA=not available, RRT = renal replacement therapy

P-values for trend were not available for co-interventions identifying no cases in some years.

(To the Next Page)

# Vasopressor at RRT start(%)

## Sepsis

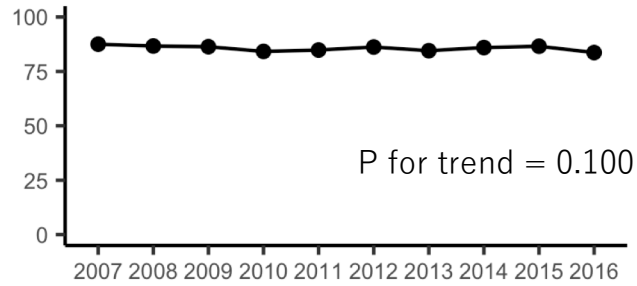

## Cardiovascular surgery

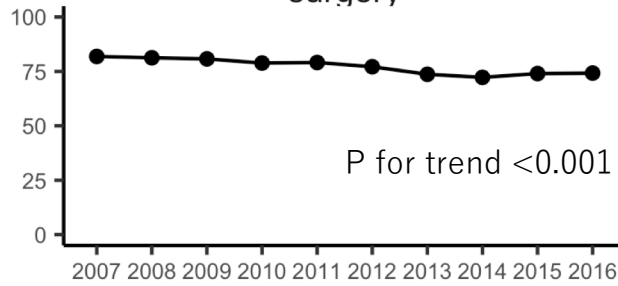

## Coronary artery disease

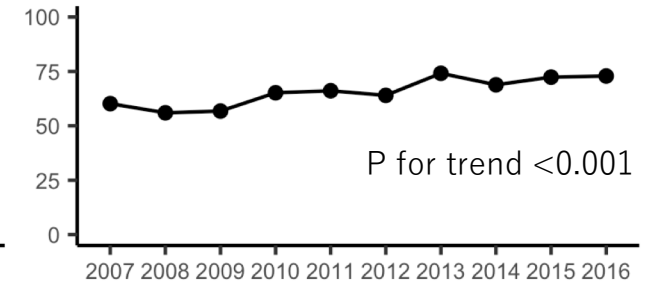

## Non-coronary heart disease

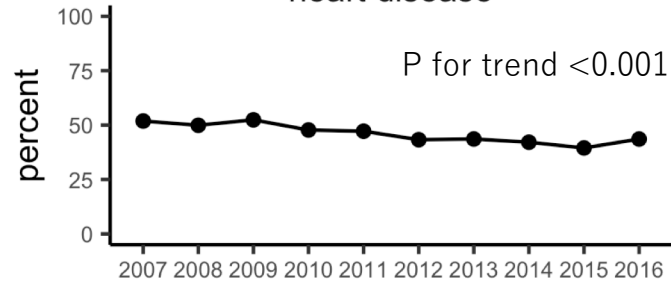

## CNS disorders

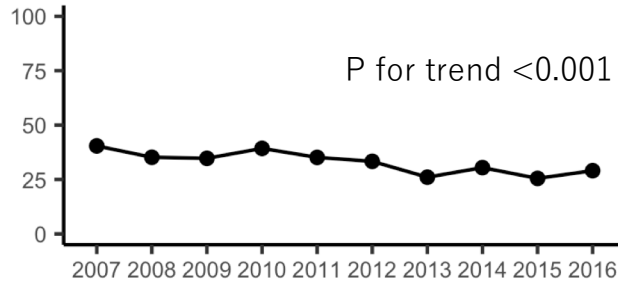

## Trauma

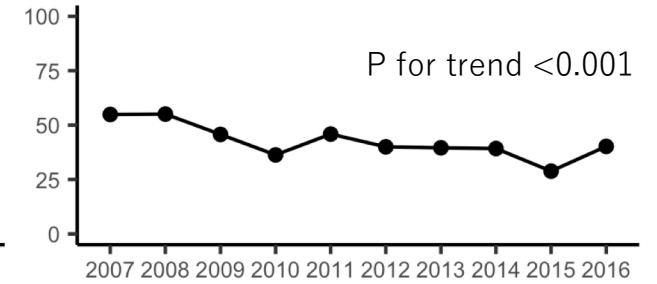

## Others

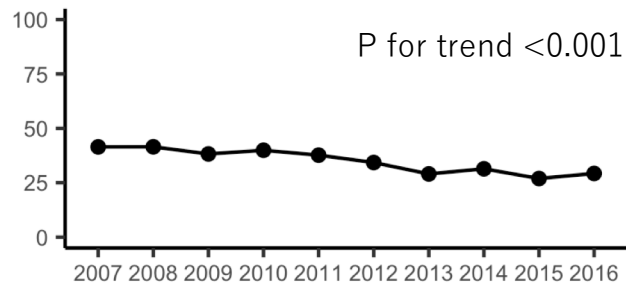

# Mechanical ventilation at RRT start(%)

## Sepsis

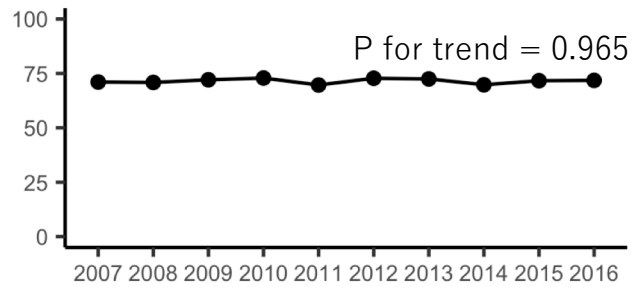

## Cardiovascular surgery

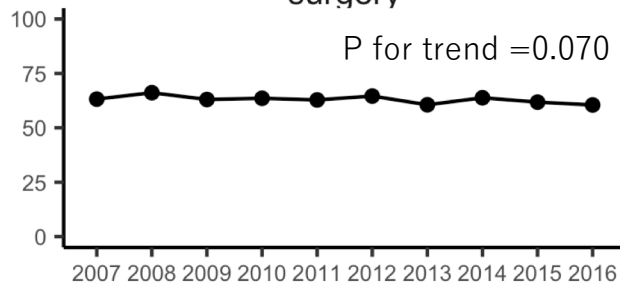

## Coronary artery disease

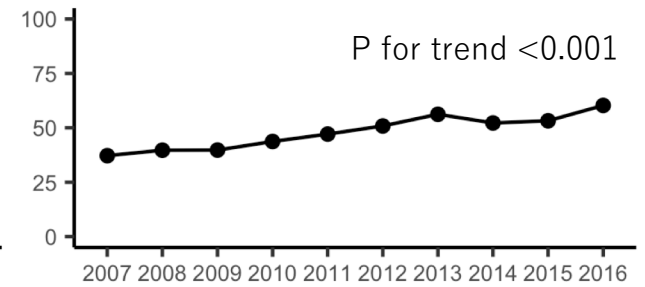

## Non-coronary heart disease

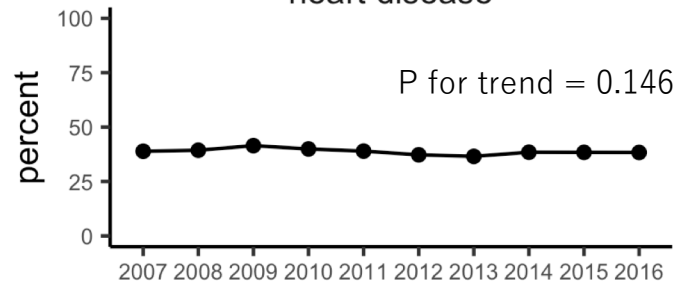

## CNS disorders

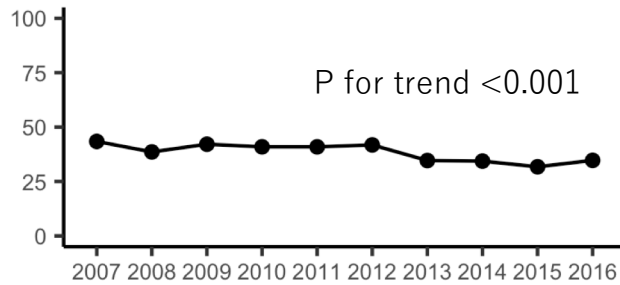

## Trauma

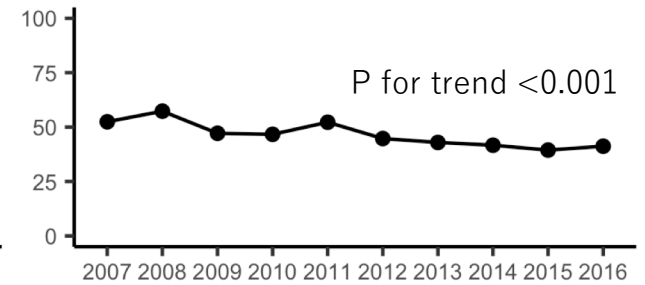

## Others

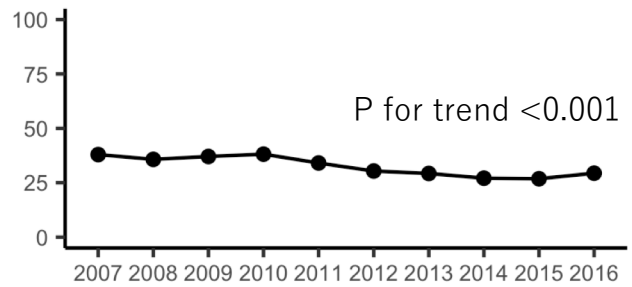

# IABP at RRT start(%)

## Sepsis

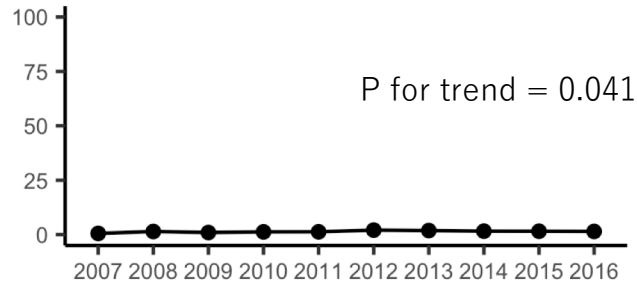

## Cardiovascular surgery

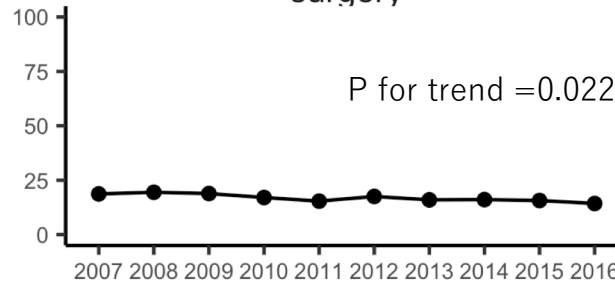

## Coronary artery disease

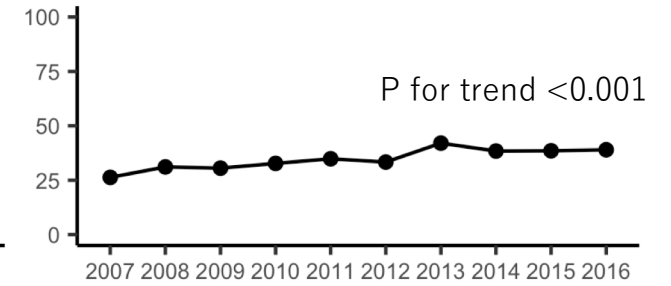

## Non-coronary heart disease

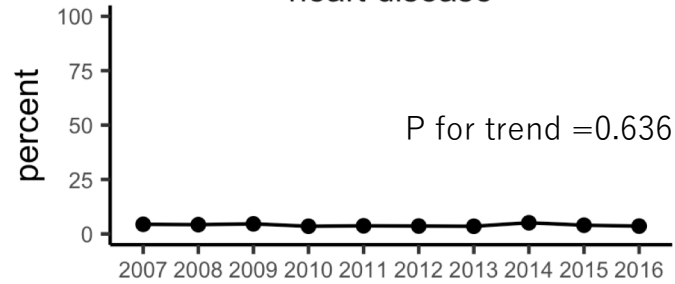

## CNS disorders

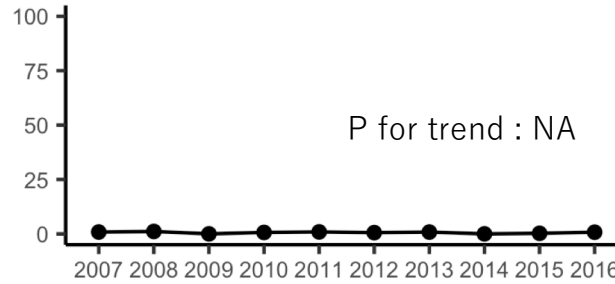

## Trauma

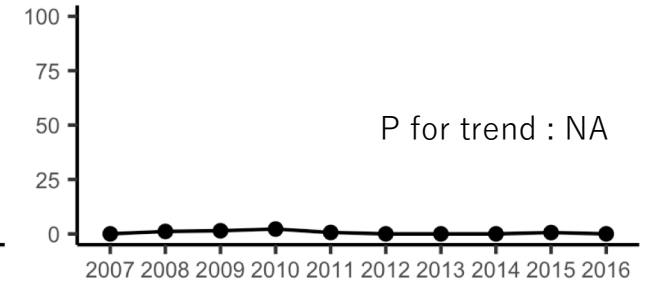

## Others

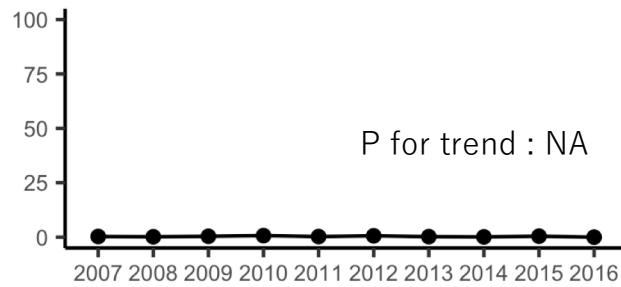

# ECMO at RRT start(%)

## Sepsis

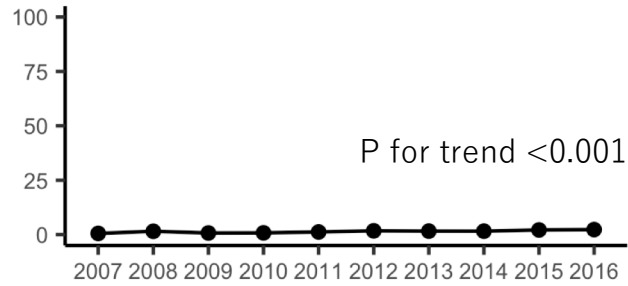

## Cardiovascular surgery

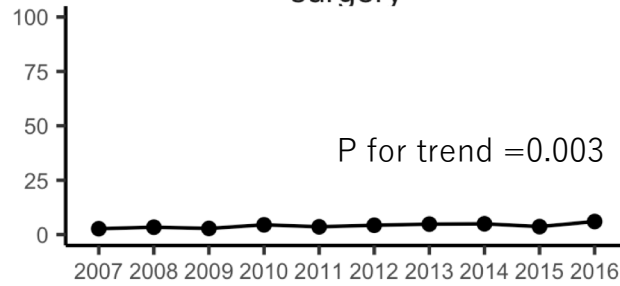

## Coronary artery disease

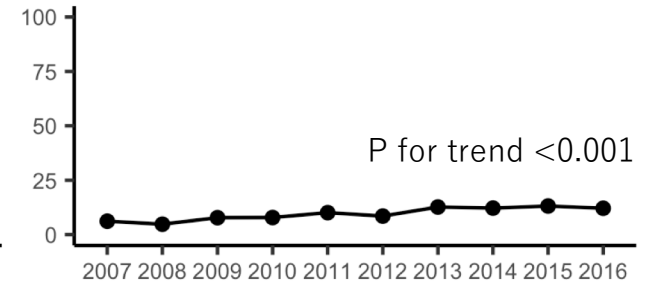

## Non-coronary heart disease

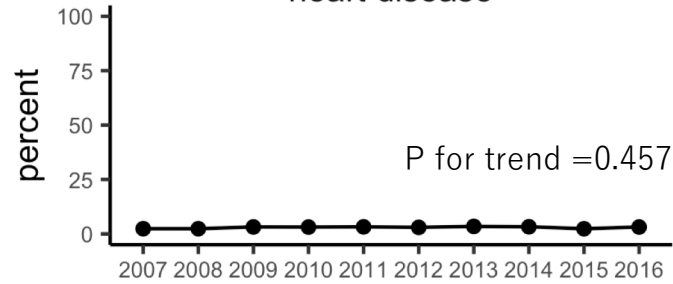

## CNS disorders

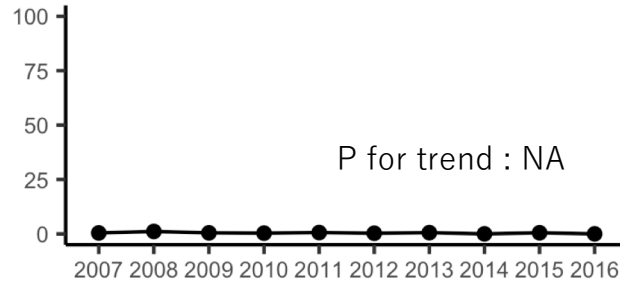

## Trauma

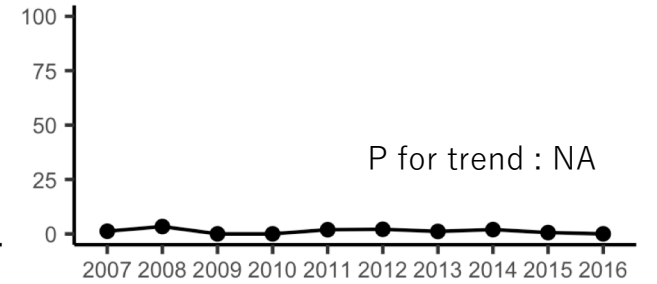

## Others

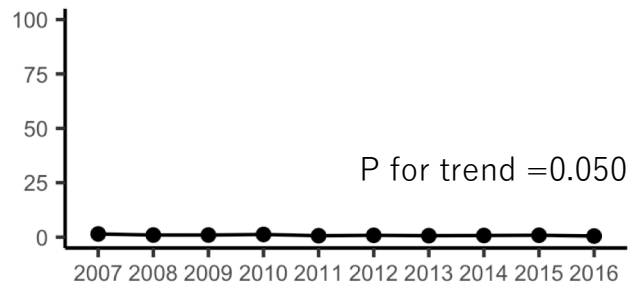

# Transfusion at RRT start(%)

## Sepsis

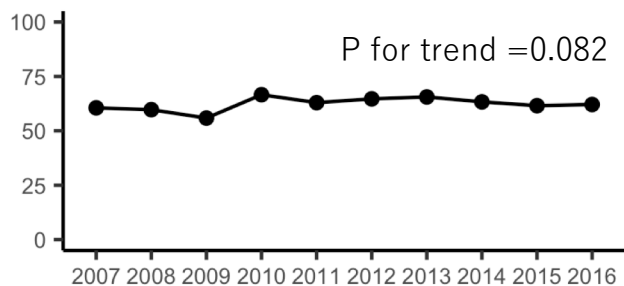

## Cardiovascular surgery

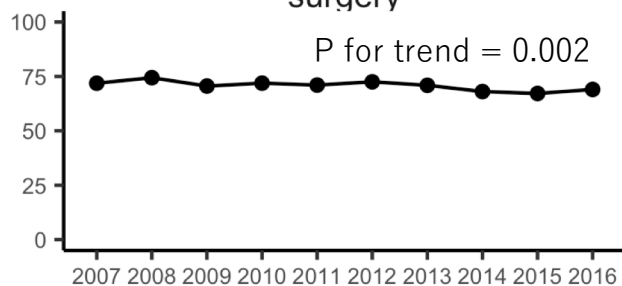

## Coronary artery disease

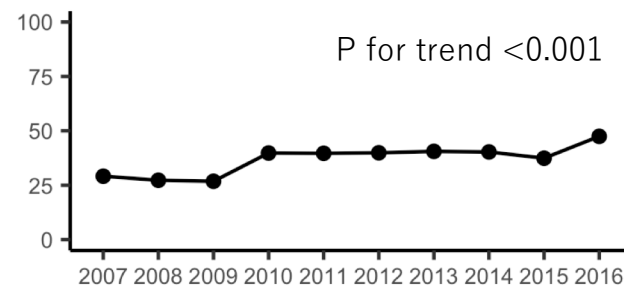

## Non-coronary heart disease

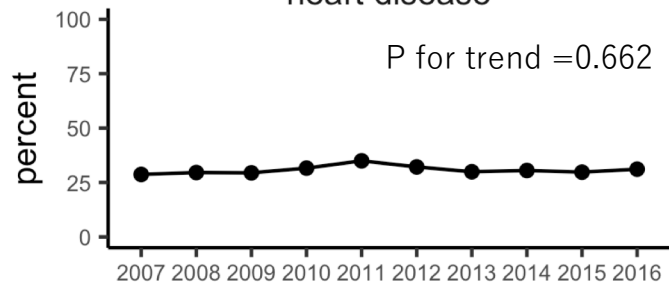

## CNS disorders

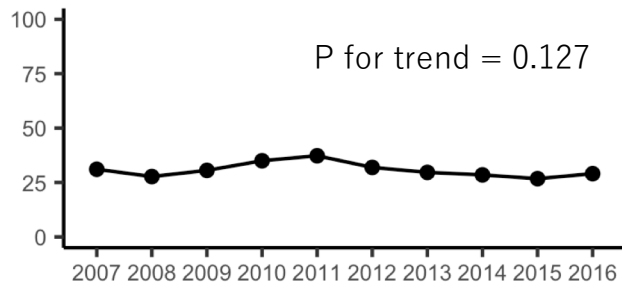

## Trauma

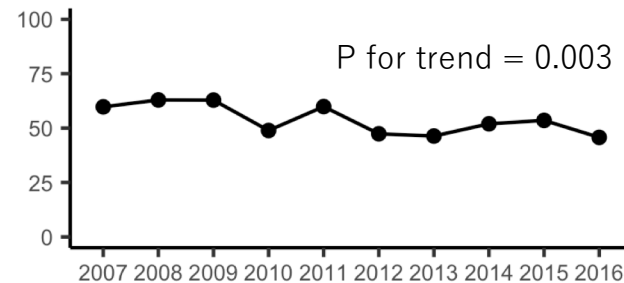

## Others

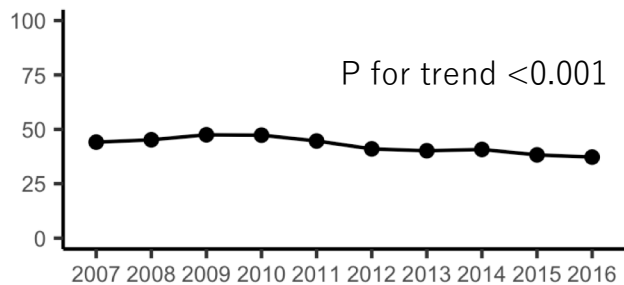



File 4. Subgroup analyses: in-hospital mortality of patients treated with renal replacement therapy for acute kidney injury in intensive care units from 2007 to 2016

| Year                                                  | 2007 | 2008 | 2009 | 2010 | 2011 | 2012 | 2013 | 2014 | 2015 | 2016 | P for trend |
|-------------------------------------------------------|------|------|------|------|------|------|------|------|------|------|-------------|
| Subgroup by age group                                 |      |      |      |      |      |      |      |      |      |      |             |
| i) < 65                                               | 36.9 | 37.5 | 37.2 | 37.3 | 34.2 | 32.5 | 32.9 | 32.6 | 33.1 | 30.1 | P<0.001     |
| ii) 65-74                                             | 45.1 | 42.6 | 45.8 | 44.6 | 41.4 | 39.3 | 34.5 | 37.8 | 34.8 | 34.9 | P<0.001     |
| iii) 75-84                                            | 52.0 | 49.8 | 49.8 | 48.9 | 46.9 | 46.7 | 44.3 | 42.7 | 39.6 | 39.9 | P<0.001     |
| iv) > 85                                              | 54.2 | 60.3 | 55.9 | 51.8 | 55.3 | 50.5 | 49.4 | 50.1 | 48.4 | 46.9 | P<0.001     |
| Subgroup by sex                                       |      |      |      |      |      |      |      |      |      |      |             |
| i) Male                                               | 44.3 | 43.7 | 44.9 | 44.1 | 41.9 | 40.6 | 38.6 | 38.7 | 36.9 | 35.8 | P<0.001     |
| ii) Female                                            | 46.0 | 45.1 | 45.1 | 43.8 | 41.6 | 39.5 | 37.6 | 38.8 | 37.2 | 36.6 | P<0.001     |
| Subgroup by CKD                                       |      |      |      |      |      |      |      |      |      |      |             |
| i) With CKD                                           | 31.7 | 28.0 | 30.2 | 25.2 | 25.0 | 24.3 | 22.9 | 23.0 | 21.1 | 21.3 | P<0.001     |
| ii) Without CKD                                       | 49.3 | 49.9 | 49.9 | 50.4 | 47.8 | 46.1 | 43.8 | 44.5 | 42.7 | 41.5 | P<0.001     |
| Subgroup by mechanical ventilation                    |      |      |      |      |      |      |      |      |      |      |             |
| i) Receiving mechanical ventilation at RRT start      | 60.0 | 57.8 | 58.0 | 58.5 | 55.1 | 53.8 | 50.5 | 52.7 | 51.0 | 50.3 | P<0.001     |
| ii) Not receiving mechanical ventilation at RRT start | 29.9 | 30.1 | 30.7 | 27.7 | 27.8 | 26.0 | 26.0 | 24.9 | 23.1 | 21.3 | P<0.001     |

File 5. The proportion of RRT dependence at discharge stratified by CKD, in patients treated with renal replacement therapy for acute kidney injury in intensive care units from 2007 to 2016

| Year            | 2007 | 2008 | 2009 | 2010 | 2011 | 2012 | 2013 | 2014 | 2015 | 2016 | P for trend |
|-----------------|------|------|------|------|------|------|------|------|------|------|-------------|
| i) With CKD     | 37.6 | 40.4 | 39.9 | 43.5 | 44.6 | 47.1 | 46.9 | 47.8 | 47.5 | 46.5 | P<0.001     |
| ii) Without CKD | 8.6  | 8.9  | 7.5  | 7.9  | 8.8  | 9.0  | 8.9  | 8.9  | 8.8  | 8.8  | P<0.001     |
